# Supplementary material for: A cost-effective and high-sensitivity pressure sensor for wearable electronics using an MXene/Ag NFs-coated cotton fabric
Source: Royal Society of Chemistry journal article supplement (doi:10.1039/d4tc04847d), 2025-01-01
Supplement: d4tc04847d1.pdf [file d4tc04847d1.pdf]

## Supporting Information

### **Cost-Effective and High-Sensitivity Pressure Sensor for Wearable Electronics Using MXene/Ag NFs-Coated Cotton Fabric**

*Yuan Fang<sup>1</sup>, Lijun Zeng<sup>1</sup>, Doudou Li, Yunfeng Su<sup>2</sup>, Nairu He<sup>\*3</sup>, Hengzhong Fan<sup>\*2</sup>*

*<sup>1</sup>School of Material Science and Engineering, Shaanxi Key Laboratory of Green Preparation and Functionalization for Inorganic Materials, Shaanxi University of Science and Technology, Xi'an, 710021, PR China*

*<sup>2</sup>State Key Laboratory of Solid Lubrication, Lanzhou Institute of Chemical Physics, Chinese Academy of Sciences, Lanzhou, 730000, PR China*

*<sup>3</sup>College of Mechanical and Electrical Engineering, Shaanxi University of Science & Technology, Xi'an, 710021, PR China*

---

*\*Corresponding author: Nairu He, Hengzhong Fan*

*E-mail address: [henairu@sust.edu.cn](mailto:henairu@sust.edu.cn); [hzhfan@licp.cas.cn](mailto:hzhfan@licp.cas.cn)*



**Fig. S1** Digital photography of  $Ti_3C_2T_x$  aqueous dispersion.



**Fig. S2** SEM images of  $Ti_3AlC_2$  powder and multilayer MXene.



**Fig. S3** (a)-(b) SEM and TEM image of MXene. (c) XRD images of  $\text{Ti}_3\text{AlC}_2$  powder, multilayer MXene after 24h etching, and monolayer MXene.



**Fig. S4** Zeta potential diagram of MXene.



**Fig. S5** Particle size distribution of Ag NFs.



**Fig. S6** SEM images of cotton fabric impregnated with different MXene: Ag NFs (mass ratio).

**Table S1.** Comparison of piezoresistive pressure sensors based on various materials.

| Materials                     | Sensitivity (kPa <sup>-1</sup> )                                                           | Sensing range (kPa) | Reference |
|-------------------------------|--------------------------------------------------------------------------------------------|---------------------|-----------|
| MXene@PDMS                    | 2.6 (5-30 KPa)                                                                             | 30                  | [15]      |
| CCF@RGO                       | 7.65 (0-3.3KPa),<br>0.98 (3.3-12.2KPa),<br>0.24 (12.2-50KPa)                               | 50                  | [29]      |
| MXene/PEDOT: PSS              | 754.5 (0-0.8KPa),<br>177.3 (0.8-3.6KPa),<br>22.3 (3.6-10.4KPa)                             | 10.4                | [38]      |
| MXene/PANI melamine sponge    | 3.7 (0-2KPa),<br>18.5 (2-16.3KPa),<br>7.1 (16.3-28.1KPa)                                   | 28.1                | [51]      |
| CNT/PDMS composite film       | 0.1661 (0-18KPa),<br>0.45743 (18-133KPa),<br>0.0989 (133-300KPa)                           | 300                 | [52]      |
| Ag NWs/MXene/non-woven fabric | 14.28 (0.25-5KPa),<br>5 (5-10KPa),<br>2 (10-20KPa),<br>0.85 (20-40KPa),<br>0.2 (40-400KPa) | 400                 | [53]      |
| GO-Ag NF-PI sponge            | 0.572 (0-10KPa)                                                                            | 10                  | [54]      |
| MXene/Ag NFs/cotton fabric    | 1.45 (0-10KPa),<br>0.67 (10-30KPa),<br>0.38 (30-60KPa)                                     | 60                  | This work |

**References:**

- [15] B. Chen, L. Zhang, H. Li, X. Lai and X. Zeng, *J. Colloid Interface Sci.*, 2022, **617**, 478-488.
- [29] R. Wu, L. Ma, A. Patil, Z. Meng, S. Liu, C. Hou, Y. Zhang, W. Yu, W. Guo and X. Y. Liu, *J. Mater. Chem. A*, 2020, **8**, 12665-12673.
- [38] Y. Li, W. Cao, Z. Liu, Y. Zhang, Z. Chen and X. Zheng, *Carbon Energy*, 2024, **6**, 224-238.
- [51] C. Yang, W. Wang, D. Zhang, C. Du, H. Zhang and H. Xia, *ACS Appl. Polym. Mater.*, 2023, **5**, 10386-10394.
- [52] Y. Zhao, T. Shen, M. Zhang, R. Yin, Y. Zheng, H. Liu, H. Sun, C. Liu and C. Shen, *Nano Mater. Sci.*, 2023, **5**, 343-350.
- [53] W. Qin, Y. Xue, G. Li, H. Peng, G. Gong, R. Yan, X. Zhao and J. Pang, *Org. Electron.*, 2024, **125**, 106958.
- [54] F. A. Khan, C. M. Ajmal, S. Bae, S. Seo, H. Moon and S. Baik, *Small*, 2018, **14**, 1800549.
